# Supplementary material for: Aberrant ARID5B expression and its association with Ikaros dysfunction in acute lymphoblastic leukemia
Source: PubMed Central journal article supplement (PMC6232140; doi:10.1038/s41389-018-0095-x), 2018-11-12
Supplement: 41389_2018_95_MOESM2_ESM.pdf [file 41389_2018_95_MOESM2_ESM.pdf]

## Supplemental Figures

### **Aberrant *ARID5B* expression and its association with Ikaros dysfunction in acute lymphoblastic leukemia**

Zheng Ge<sup>1,2,§</sup>, Qi Han<sup>1,2</sup>, Yan Gu<sup>1,2</sup>, Qinyu Ge<sup>3</sup>, Jinlong Ma<sup>1,2</sup>, Justin Sloane<sup>4,5</sup>, Guofeng Gao<sup>6</sup>, Kimberly J. Payne<sup>2,7</sup>, Laszlo Szekely<sup>2,8</sup>, Chunhua Song<sup>2,5, §</sup>, Sinisa Dovat<sup>2,5, §</sup>

<sup>1</sup>Department of Hematology, Zhongda Hospital Southeast University, Institute of Hematology Southeast University, Nanjing 210009, China;

<sup>2</sup>International Cooperative Leukemia Group and International Cooperative Laboratory of Hematology, Zhongda Hospital Southeast University, Nanjing 210009, China;

<sup>3</sup>State Key Laboratory of Bioelectronics, School of Biological Science and Medical Engineering, Southeast University, Nanjing 210096, China;

<sup>4</sup>Abington Hospital, Jefferson Health, Abington, PA 19001, USA;

<sup>5</sup>Department of Pediatrics, Pennsylvania State University Medical College, Hershey, PA17033, USA;

<sup>6</sup>Department of Pathology and Laboratory Medicine, University of California-Davis Medical Center, Sacramento, CA 95817, USA

<sup>7</sup>Loma Linda University, Department of Pathology and Human Anatomy, Loma Linda, CA, 92350, USA;

<sup>8</sup>Department of Medicine, Laboratory of Clinical Pathology and cytology, Karolinska University Hospital, Solna, L2:04, SE-171 76 Stockholm, Sweden

**Keywords:** *ARID5B*; Ikaros; *PHF2*; leukemia; epigenetics, prognosis

**Running title:** *ARID5B* low expression in ALL

§Co-correspondence to:

Zheng Ge, M.D., Ph.D.

Zhongda Hospital Southeast University

Department of Hematology

Nanjing 210009, China

Telephone: 86-25-83262468

FAX: 86-25-83262471

E-mail: [Janege879@hotmail.com](mailto:Janege879@hotmail.com)

Chunhua Song, M.D., Ph.D.

Pennsylvania State University College of Medicine

Department of Pediatrics

500 University Drive

Hershey, PA 17033, USA

Telephone: 717-531-1841

FAX: 717-531-4789

E-mail: [csong@pennstatehealth.psu.edu](mailto:csong@pennstatehealth.psu.edu)

Sinisa Dovat, M.D., Ph.D.

Pennsylvania State University College of Medicine,

Department of Pediatrics

500 University Drive

Hershey, PA 17033, USA

Telephone: 717-531-6012

FAX: 717-531-4789

E-mail: [sdovat@pennstatehealth.psu.edu](mailto:sdovat@pennstatehealth.psu.edu)

### MegaSampler (n=443, MAS5.0)

ARID5B (212614\_at)

transform\_2log

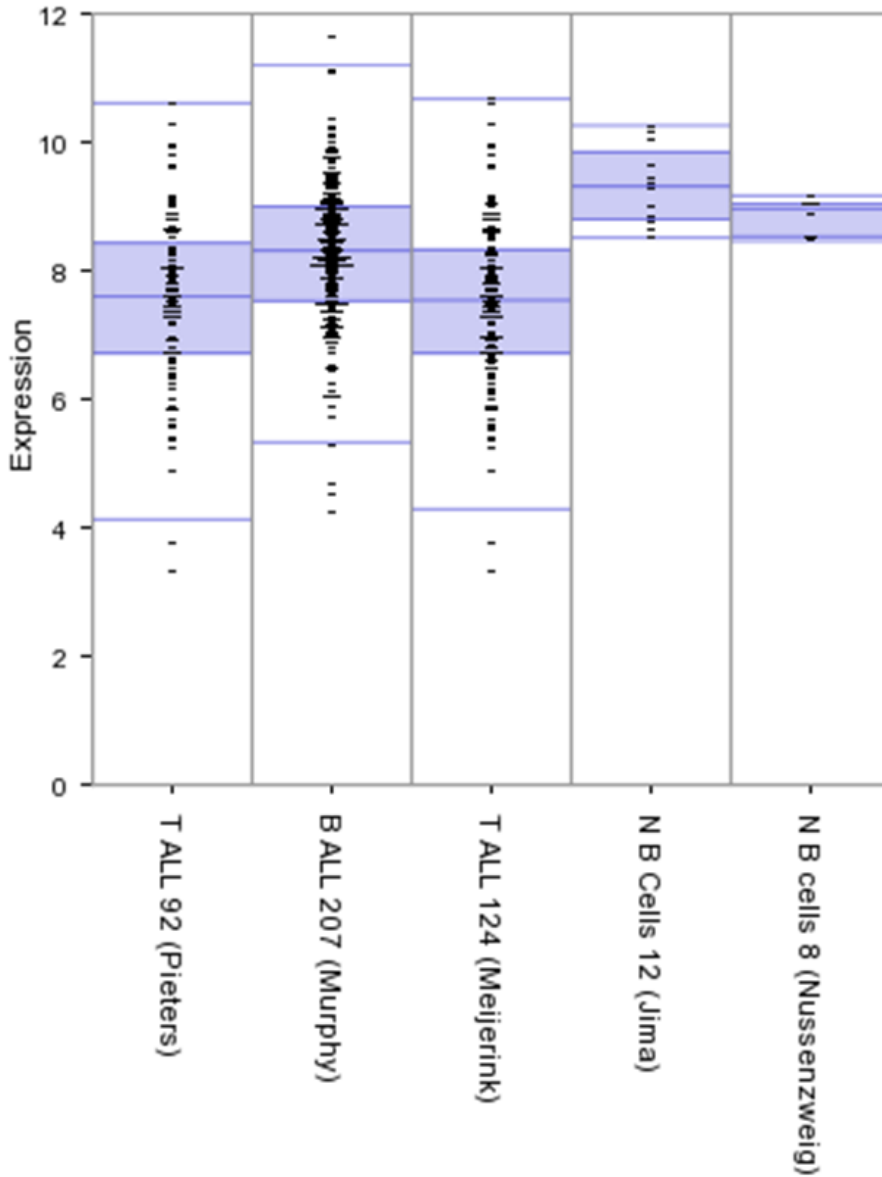

**Fig. S1** *ARID5B* expression in the reported ALL microarray cohort studies. Leukemia types are as indicated as well as normal (N) B cells. Data generated from human oncogenomics server (<https://hgserver1.amc.nl/cgi-bin/r2/main.cgi>) with GEO database (GSE7440, GSE11877, GSE10609, GSE26713 and GSE28491). The default one way Analysis of Variance (ANOVA) in the server was used for statistical analysis.

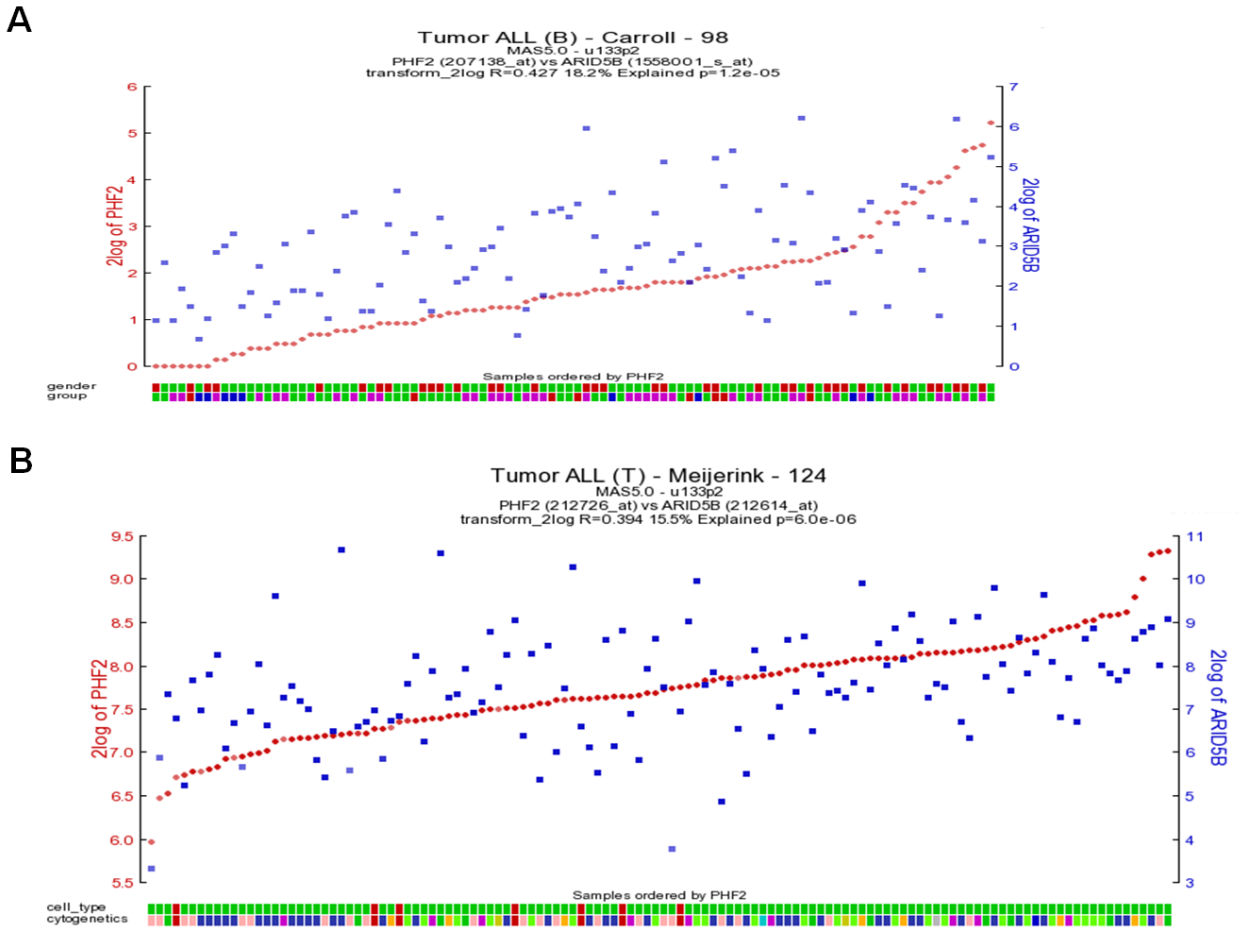

**Fig. S2 Correlation of *ARID5B* expression with *PHF2* in the cohort of (A) B-ALL and (B) T-ALL patients.** Data generated from human oncogenomics server (<https://hgserver1.amc.nl/cgi-bin/r2/main.cgi>) with GEO database (GSE11877 and GSE26713). The default Pearson correlation in the server was used to calculate the statistics.

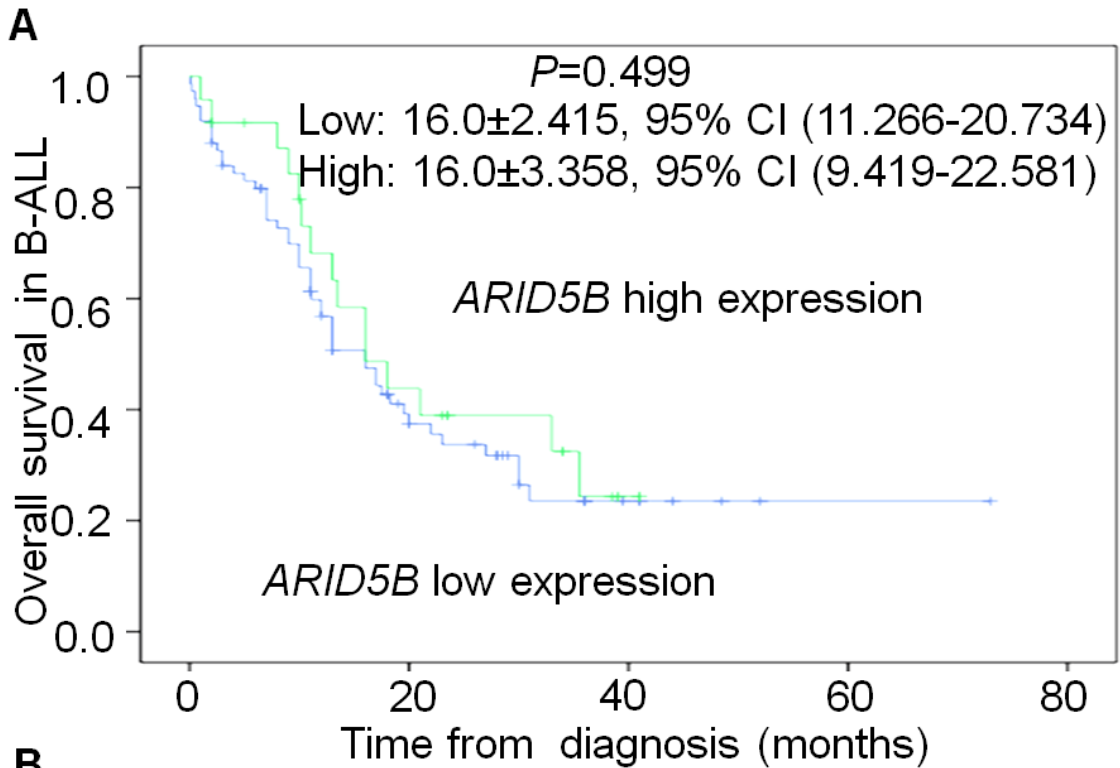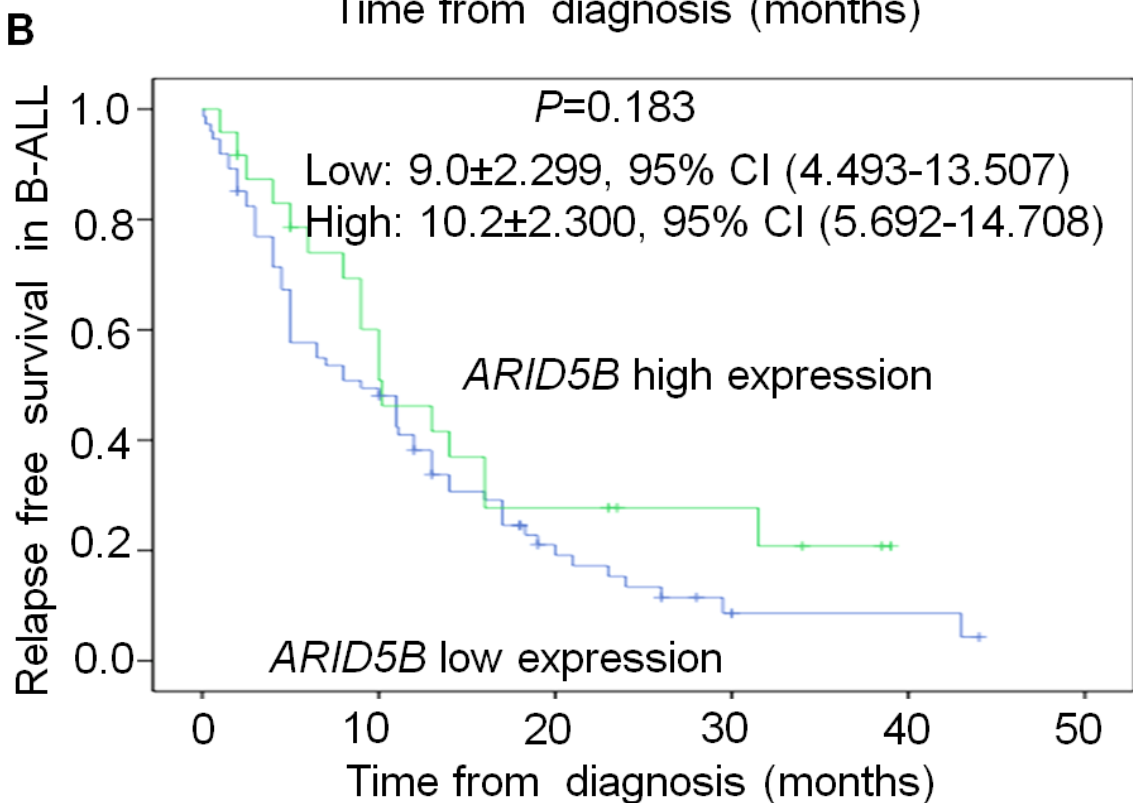

**Fig. S3** Association of *ARID5B* low expression with **(A)** overall survival and **(B)** relapse free survival in B-ALL

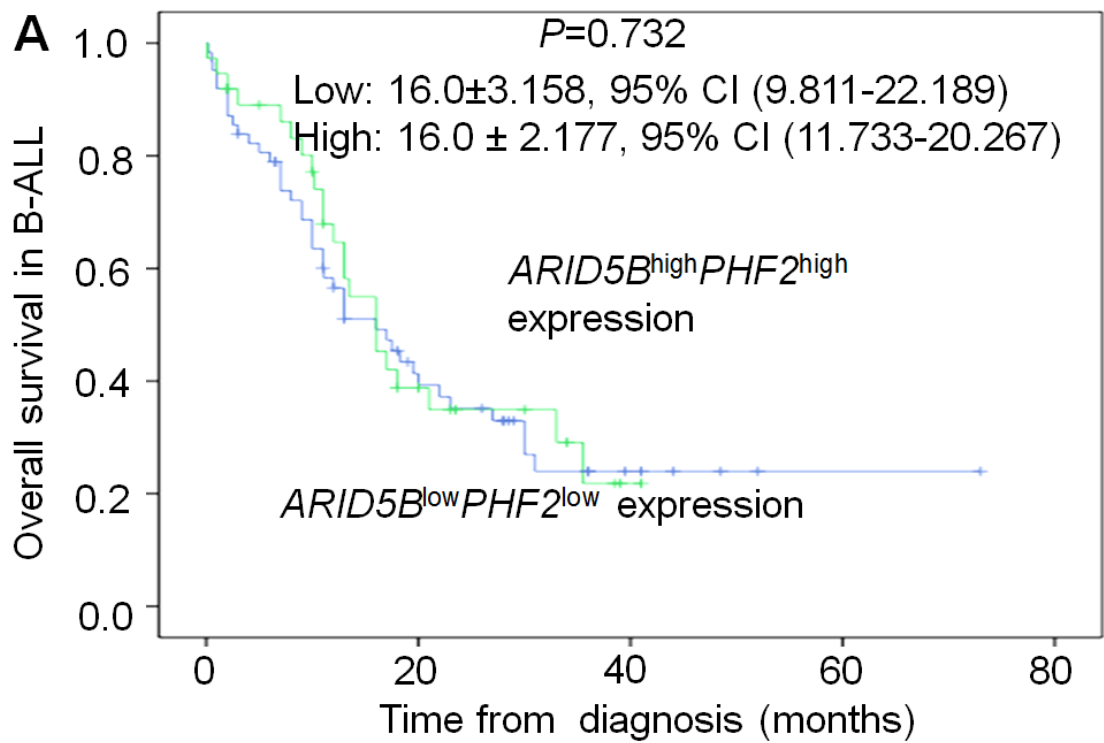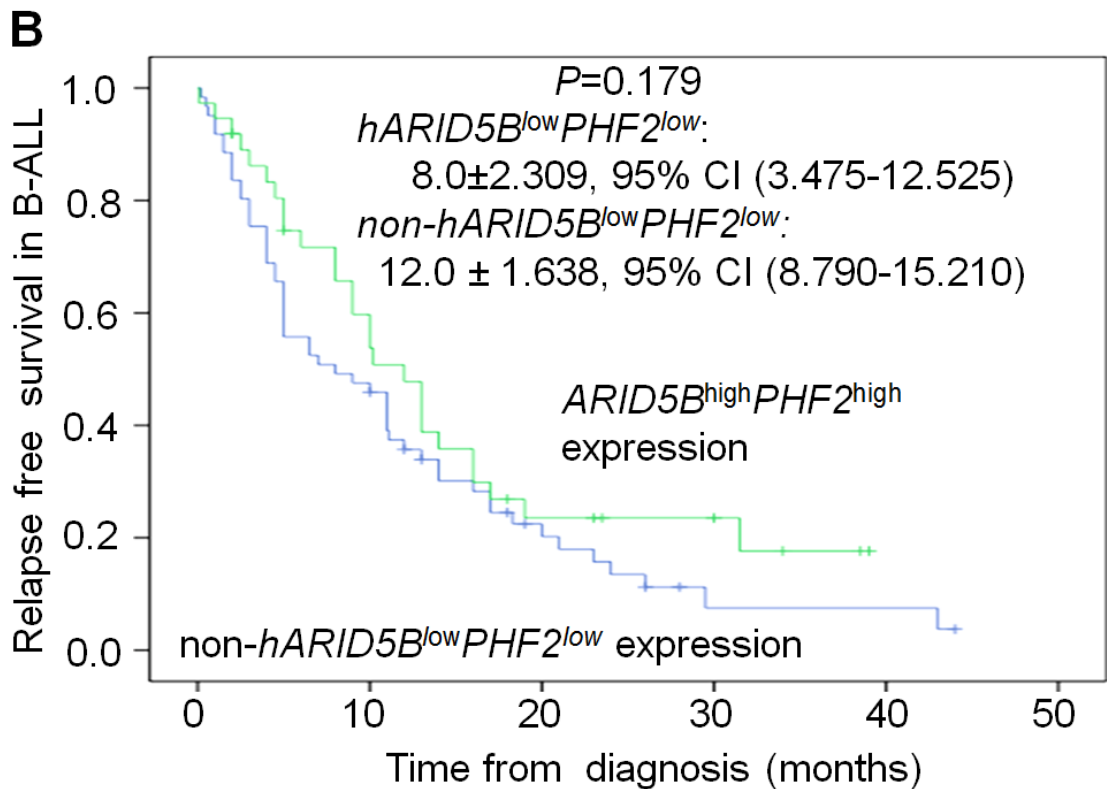

**Fig. S4** Association of *ARID5B*<sup>low</sup>*PHF2*<sup>low</sup> expression with **(A)** overall survival and **(B)** relapse free survival in B-ALL

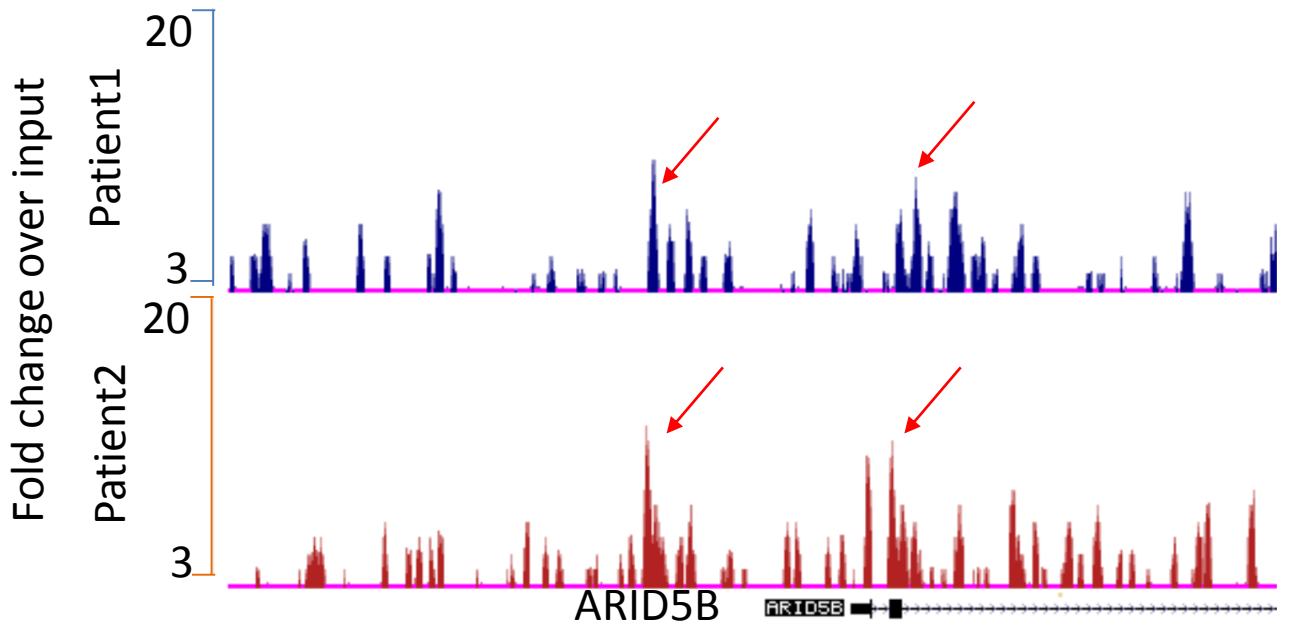

**Fig S5** Ikaros binds to the promoter of ARID5B in primary B-ALL from different patients identified by ChIP-seq.

**A**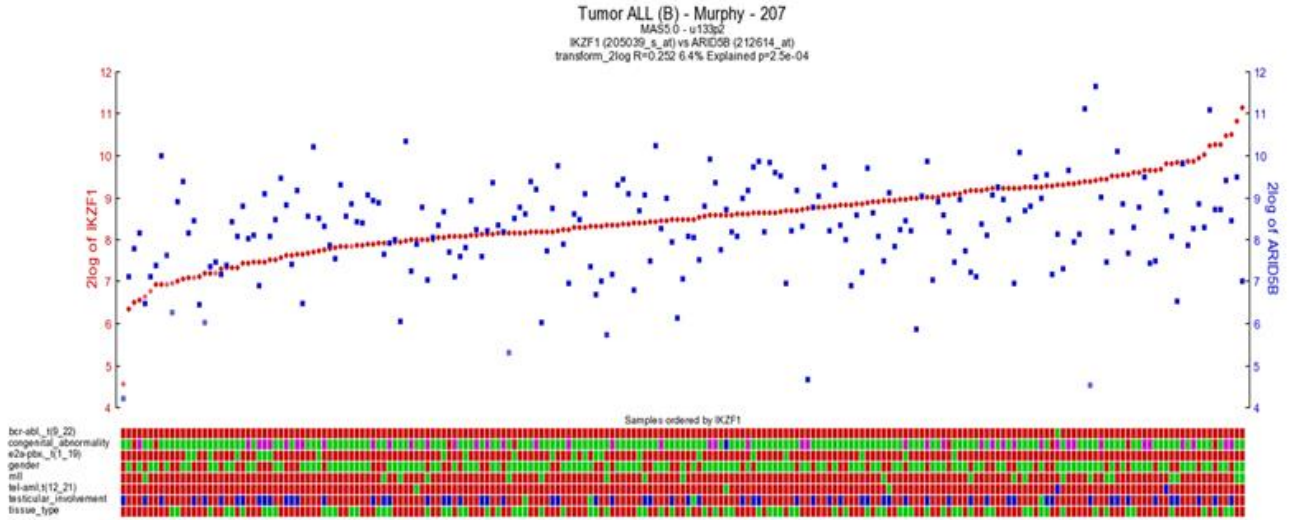**B**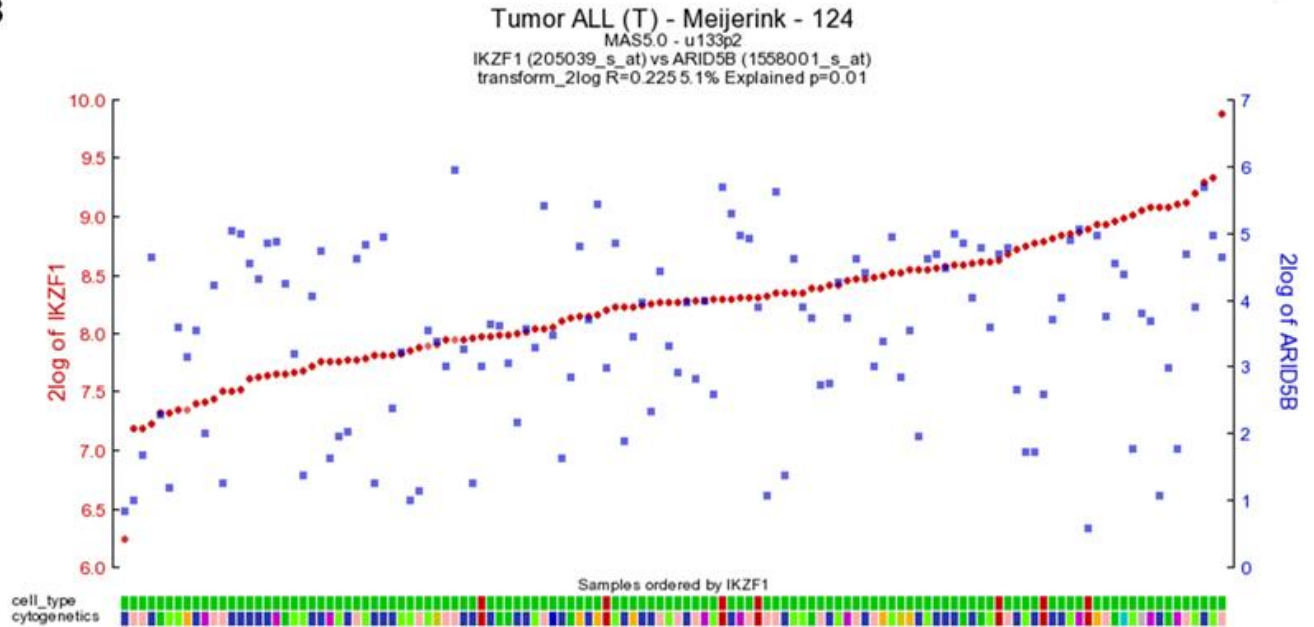

**Fig. S6 Correlation of *ARID5B* expression with *Ikaros* in the cohort of (A) B-ALL and (B) T-ALL patients.** Data generated from human oncogenomics server with GEO database (GSE11877 and GSE26713). Pearson correlation is used to calculate the statistics.
